# Supplementary material for: Stroke Risk Stratification in Patients With Postoperative Atrial Fibrillation After Coronary Artery Bypass Grafting
Source: PubMed Central journal article supplement — J Am Heart Assoc. 2022 May 16;11(10):e024703. doi: 10.1161/JAHA.121.024703 (PMC9238552; doi:10.1161/jaha.121.024703), 2022-05-16
Supplement: JAH3-11-e024703-s001.pdf [file JAH3-11-e024703-s001.pdf]

# **SUPPLEMENTAL MATERIAL**

**Table S1. List of diagnoses according to ICD-10: International classification of diseases 10th version.**

| <b>Variable</b>                              | <b>ICD-codes</b>                                                                                                                                                                     |
|----------------------------------------------|--------------------------------------------------------------------------------------------------------------------------------------------------------------------------------------|
| <b>Intracranial bleeding</b>                 | I60, I61, I62, I690, I691, I692                                                                                                                                                      |
| <b>Gastrointestinal bleeding</b>             | I850, I983, K226, K250, K252, K254, K256, K260, K262, K264, K266, K270, K272, K274, K276, K280, K284, K290, K625, K661, K920, K921, K922, K25, K26, K27, K28, I850, I983, K221, K226 |
| <b>Hemopericardium</b>                       | I230, I312                                                                                                                                                                           |
| <b>Hemothorax</b>                            | J942                                                                                                                                                                                 |
| <b>Urogenital bleeding</b>                   | N02, R319, N95, N939, N501A                                                                                                                                                          |
| <b>Other bleeding</b>                        | H431, R04, R58, D629, T810, DR029, D50                                                                                                                                               |
| <b>Anemia</b>                                | D50-64                                                                                                                                                                               |
| <b>Atrial fibrillation</b>                   | I48                                                                                                                                                                                  |
| <b>Ischemic stroke</b>                       | I63, I69.3, I69.4                                                                                                                                                                    |
| <b>Stroke unspecified</b>                    | I64                                                                                                                                                                                  |
| <b>Transitory ischemic attack</b>            | G45, I66, I65                                                                                                                                                                        |
| <b>Peripheral arterial embolism</b>          | I74                                                                                                                                                                                  |
| <b>Heart failure</b>                         | I50, I110, I130, I132, I255, I42-43                                                                                                                                                  |
| <b>Hypertension</b>                          | I10-15                                                                                                                                                                               |
| <b>Diabetes mellitus</b>                     | E10-14                                                                                                                                                                               |
| <b>Ischemic heart disease</b>                | I20, I24, I25                                                                                                                                                                        |
| <b>Myocardial infarction</b>                 | I21, I22                                                                                                                                                                             |
| <b>Percutaneous coronary intervention</b>    | FNG                                                                                                                                                                                  |
| <b>Peripheral vascular disease</b>           | I70, I71, I72, I73, I74, I77                                                                                                                                                         |
| <b>Vascular disease</b>                      | I21, I22, I252, I70-73                                                                                                                                                               |
| <b>Renal disease and RRT</b>                 | N17-19, DR016, DR024, KAS10, KAS20                                                                                                                                                   |
| <b>Liver disease</b>                         | K70-77, JJB, JJC                                                                                                                                                                     |
| <b>Alcohol related conditions</b>            | E244, F10, G312, G621, G721, I426, K292, K70, K860, O354, P043, Q860, T51, Y90-91, Z502, Z714                                                                                        |
| <b>Chronic obstructive pulmonary disease</b> | J44                                                                                                                                                                                  |
| <b>Pulmonary embolism</b>                    | I26                                                                                                                                                                                  |
| <b>Deep vein thrombosis</b>                  | I80                                                                                                                                                                                  |
| <b>Major bleeding</b>                        | D62, N03, R31, D683, H356, H922, I230, I312, J942, M250, N421, N939, N950, R040, R041, R042, R048, R049, N501A + Intracranial bleeding + Gastrointestinal bleeding                   |

RRT: Renal replacement therapy

**Table S2. List of medications according to ATC: The Anatomical Therapeutic Classification.**

| <b>Medication</b>                                | <b>ATC-codes</b>        |
|--------------------------------------------------|-------------------------|
| <b>Renin-angiotensin inhibitors</b>              | C09                     |
| <b>Betablockers</b>                              | C07 (excluding C07AA07) |
| <b>Mineralocorticoid receptor antagonists</b>    | C03DA                   |
| <b>Calcium antagonists</b>                       | C08                     |
| <b>Oral anticoagulants</b>                       | B01AA, B01AE, B01AF     |
| <b>Antiplatelets</b>                             | B01AC                   |
| <b>Lipid lowering agents</b>                     | C10                     |
| <b>Antidiabetics</b>                             | A10                     |
| <b>Systemic corticosteroids</b>                  | H02                     |
| <b>Antiinflammatory and antirheumatic agents</b> | M01                     |
| <b>Diuretics</b>                                 | C03 (excluding C03DA)   |
| <b>Antiarrhythmic drugs</b>                      | C01B, C07AA07           |
| <b>Digoxin</b>                                   | C01AA05                 |

**Table S3. Baseline characteristics according to CHA<sub>2</sub>DS<sub>2</sub>-VASc category presented as number and proportions (%) or mean (SD).**

|                                    |                                   | 1                        | 2                          | 3                          | 4                          | 5                          | 6                        | 7                        | 8                       | 9                      |
|------------------------------------|-----------------------------------|--------------------------|----------------------------|----------------------------|----------------------------|----------------------------|--------------------------|--------------------------|-------------------------|------------------------|
|                                    | <b>All patients<br/>(n= 6368)</b> | <b>n= 328<br/>(5.2%)</b> | <b>n= 1066<br/>(16.7%)</b> | <b>n= 1662<br/>(26.1%)</b> | <b>n= 1621<br/>(25.5%)</b> | <b>n= 1038<br/>(16.3%)</b> | <b>n= 423<br/>(6.6%)</b> | <b>n= 179<br/>(2.8%)</b> | <b>n= 47<br/>(0.7%)</b> | <b>n= 4<br/>(0.1%)</b> |
| <b>Male sex</b>                    | 5170 (81.2)                       | 392 (100.0)              | 1041 (97.7)                | 1534 (92.3)                | 1310 (80.8)                | 616 (59.3)                 | 240 (56.7)               | 89 (49.7)                | 12 (25.5)               | 0 (0.0)                |
| <b>Age [yrs]</b>                   | 69.9 (7.9)                        | 58.6 (4.9)               | 63.6 (6.6)                 | 68.8 (6.7)                 | 72.6 (6.6)                 | 74.3 (6.1)                 | 75.4 (5.9)               | 75.1 (5.4)               | 77.4 (3.9)              | 76.8 (1.7)             |
| <b>Body mass index I [kg*m-2]</b>  | 27.6 (5.0)                        | 26.9 (3.6)               | 27.6 (3.9)                 | 27.7 (5.2)                 | 27.7 (6.3)                 | 27.6 (4.3)                 | 28.0 (4.5)               | 27.6 (4.5)               | 27.2 (4.4)              | 27.6 (2.3)             |
| <b>Acute coronary syndrome</b>     | 3196 (50.2)                       | 158 (48.2)               | 474 (44.5)                 | 782 (47.1)                 | 810 (50.0)                 | 573 (55.2)                 | 260 (61.5)               | 106 (59.2)               | 30 (63.8)               | 3 (75.0)               |
| <b>Heart failure</b>               | 825 (13.0)                        | 0 (0.0)                  | 33 (3.1)                   | 120 (7.2)                  | 194 (12.0)                 | 227 (21.9)                 | 150 (35.5)               | 73 (40.8)                | 24 (51.1)               | 4 (100.0)              |
| <b>Hypertension</b>                | 4727 (74.2)                       | 0 (0.0)                  | 483 (45.3)                 | 1190 (71.6)                | 1453 (89.6)                | 971 (93.5)                 | 402 (95.0)               | 177 (98.9)               | 47(100.0)               | 4 (100.0)              |
| <b>Diabetes mellitus</b>           | 1915 (30.1)                       | 0 (0.0)                  | 63 (5.9)                   | 320 (19.3)                 | 624 (38.5)                 | 496 (47.8)                 | 248 (58.6)               | 117 (65.4)               | 43 (91.5)               | 4 (100.0)              |
| <b>Peripheral vascular disease</b> | 658 (10.3)                        | 7 (2.1)                  | 66 (6.2)                   | 148 (8.9)                  | 174 (10.7)                 | 139 (13.4)                 | 62 (14.7)                | 48 (26.8)                | 12 (25.5)               | 2 (50.0)               |
| <b>Previous stroke</b>             | 438 (6.9)                         | 0 (0.0)                  | 0 (0.0)                    | 2 (0.1)                    | 39 (2.4)                   | 131 (12.6)                 | 145 (34.3)               | 89 (49.7)                | 32 (68.1)               | 0 (0.0)                |
| <b>Transitory ischemic attack</b>  | 388 (6.1)                         | 0 (0.0)                  | 0 (0.0)                    | 6 (0.4)                    | 24 (1.5)                   | 127 (12.2)                 | 108 (25.5)               | 97 (54.2)                | 23 (48.9)               | 3 (75.0)               |
| <b>Arterial embolism</b>           | 28 (0.4)                          | 0 (0.0)                  | 0 (0.0)                    | 1 (0.1)                    | 0 (0.0)                    | 11 (1.1)                   | 6 (1.4)                  | 7 (3.9)                  | 2 (4.3)                 | 1 (25.0)               |
| <b>Pulmonary embolism</b>          | 39 (0.6)                          | 1 (0.3)                  | 2 (0.2)                    | 11 (0.7)                   | 9 (0.6)                    | 9 (0.9)                    | 4 (0.9)                  | 2 (1.1)                  | 1 (2.1)                 | 0 (0.0)                |
| <b>Deep vein thrombosis</b>        | 129 (2.0)                         | 4 (1.2)                  | 13 (1.2)                   | 32 (1.9)                   | 44 (2.7)                   | 22 (2.1)                   | 10 (2.4)                 | 3 (1.7)                  | 1 (2.1)                 | 0 (0.0)                |
| <b>Respiratory disease</b>         | 678 (10.6)                        | 24 (7.3)                 | 91 (8.5)                   | 177 (10.6)                 | 160 (9.9)                  | 120 (11.6)                 | 66 (15.6)                | 34 (19.0)                | 5 (10.6)                | 1 (25.0)               |
| <b>Renal failure</b>               | 233 (3.7)                         | 3 (0.9)                  | 9 (0.8)                    | 42 (2.5)                   | 71 (4.4)                   | 53 (5.1)                   | 33 (7.8)                 | 14 (7.8)                 | 7 (14.9)                | 1 (25.0)               |
| <b>Renal replacement therapy</b>   | 26 (0.4)                          | 0 (0.0)                  | 1 (0.1)                    | 7 (0.4)                    | 8 (0.5)                    | 5 (0.5)                    | 4 (0.9)                  | 1 (0.6)                  | 0 (0.0)                 | 0 (0.0)                |
| <b>Liver disease</b>               | 56 (0.9)                          | 1 (0.3)                  | 4 (0.4)                    | 10 (0.6)                   | 20 (1.2)                   | 13 (1.3)                   | 3 (0.7)                  | 4 (2.2)                  | 1 (2.1)                 | 0 (0.0)                |
| <b>Cancer</b>                      | 969 (15.2)                        | 18 (5.5)                 | 100 (9.4)                  | 255 (15.3)                 | 285 (17.6)                 | 197 (19.0)                 | 80 (18.9)                | 28 (15.6)                | 6 (12.8)                | 0 (0.0)                |

**Table S4. Medications at discharge according to CHA<sub>2</sub>DS<sub>2</sub>-VASc category presented as number and proportions (%).**

|                              |                                   | <b>1</b>                 | <b>2</b>                   | <b>3</b>                   | <b>4</b>                   | <b>5</b>                   | <b>6</b>                 | <b>7</b>                 | <b>8</b>                | <b>9</b>               |
|------------------------------|-----------------------------------|--------------------------|----------------------------|----------------------------|----------------------------|----------------------------|--------------------------|--------------------------|-------------------------|------------------------|
|                              | <b>All patients<br/>(n= 6368)</b> | <b>n= 328<br/>(5.2%)</b> | <b>n= 1066<br/>(16.7%)</b> | <b>n= 1662<br/>(26.1%)</b> | <b>n= 1621<br/>(25.5%)</b> | <b>n= 1038<br/>(16.3%)</b> | <b>n= 423<br/>(6.6%)</b> | <b>n= 179<br/>(2.8%)</b> | <b>n= 47<br/>(0.7%)</b> | <b>n= 4<br/>(0.1%)</b> |
| <b>Antiplatelets</b>         | 6181 (97.1)                       | 325 (99.1)               | 1050 (98.5)                | 1616 (97.2)                | 1575 (97.2)                | 995 (95.9)                 | 403 (95.3)               | 168 (93.9)               | 45 (95.7)               | 4 (100.0)              |
| <b>DAPT</b>                  | 1304 (20.5)                       | 75 (22.9)                | 236 (22.1)                 | 322 (19.4)                 | 312 (19.2)                 | 194 (18.7)                 | 101 (23.9)               | 50 (27.9)                | 12 (25.5)               | 2 (50.0)               |
| <b>Lipid lowering agents</b> | 6107 (95.9)                       | 323 (98.5)               | 1040 (97.6)                | 1604 (96.5)                | 1539 (94.9)                | 995 (95.9)                 | 406 (96.0)               | 159 (88.8)               | 37 (78.7)               | 4 (100.0)              |
| <b>Beta blockers</b>         | 5909 (92.8)                       | 305 (93.0)               | 998 (92.7)                 | 1542 (92.8)                | 1494 (92.2)                | 980 (94.4)                 | 394 (93.1)               | 162 (90.5)               | 40 (85.1)               | 4 (100.0)              |
| <b>ACE-i /ARB</b>            | 4888 (76.8)                       | 182 (55.5)               | 728 (68.3)                 | 1247 (75.0)                | 1319 (81.4)                | 864 (83.2)                 | 365 (86.3)               | 141 (78.8)               | 38 (80.9)               | 4 (100.0)              |
| <b>MRA</b>                   | 750 (11.8)                        | 22 (6.7)                 | 76 (7.1)                   | 157 (9.4)                  | 201 (12.4)                 | 160 (15.4)                 | 77 (18.2)                | 40 (22.3)                | 14 (29.8)               | 3 (75.0)               |
| <b>CCB</b>                   | 1774 (27.9)                       | 17 (5.2)                 | 185 (17.4)                 | 446 (26.8)                 | 546 (33.7)                 | 354 (34.1)                 | 140 (33.1)               | 68 (38.0)                | 18 (38.3)               | 0 (0.0)                |
| <b>Diuretics</b>             | 3091 (48.5)                       | 72 (22.0)                | 364 (34.1)                 | 721 (43.4)                 | 847 (52.3)                 | 640 (61.7)                 | 287 (67.8)               | 119 (66.5)               | 38 (80.9)               | 3 (75.0)               |
| <b>Digoxin</b>               | 135 (2.1)                         | 3 (0.9)                  | 13 (1.2)                   | 39 (2.3)                   | 37 (2.3)                   | 26 (2.5)                   | 9 (2.1)                  | 7 (3.9)                  | 1 (2.1)                 | 0 (0.0)                |
| <b>Sotalol</b>               | 712 (11.2)                        | 51 (15.5)                | 150 (14.1)                 | 179 (10.8)                 | 185 (11.4)                 | 94 (9.1)                   | 32 (7.6)                 | 18 (10.1)                | 3 (6.4)                 | 0 (0.0)                |
| <b>Amiodarone</b>            | 763 (12.0)                        | 42 (12.8)                | 137 (12.9)                 | 197 (11.9)                 | 193 (11.9)                 | 119 (11.5)                 | 47 (11.1)                | 24 (13.4)                | 3 (6.4)                 | 1 (25.0)               |
| <b>Antidiabetics</b>         | 1222 (19.2)                       | 4 (1.2)                  | 56 (5.3)                   | 220 (13.2)                 | 419 (25.8)                 | 307 (29.6)                 | 130 (30.7)               | 70 (39.1)                | 15 (31.9)               | 1 (25.5)               |

ACE-i: Angiotensin converting-enzyme inhibitor; ARB: Angiotensin receptor blocker; CCB: Calcium channel blocker; DAPT: Dual antiplatelete therapy; MRA: Mineralocorticoid receptorantagonist

**Table S5. The number of ischemic strokes at one-year according to sex and CHA<sub>2</sub>DS<sub>2</sub>-VASc score.**

| CHA <sub>2</sub> DS <sub>2</sub> -VASc score | Total no. of ischemic strokes | Male                |                         | Female              |                         |
|----------------------------------------------|-------------------------------|---------------------|-------------------------|---------------------|-------------------------|
|                                              |                               | No. of patients (%) | No. of ischemic strokes | No. of patients (%) | No. of ischemic strokes |
| 1 (n=328)                                    | 1                             | 328 (100.0)         | 1                       | 0 (0.0)             | 0                       |
| 2 (n=1066)                                   | 7                             | 1041 (97.7)         | 7                       | 25 (2.3)            | 0                       |
| 3 (n=1662)                                   | 22                            | 1534 (92.3)         | 18                      | 128 (7.7)           | 4                       |
| 4 (n=1621)                                   | 33                            | 1310 (80.8)         | 27                      | 311 (19.2)          | 6                       |
| 5 (n=1038)                                   | 39                            | 616 (59.3)          | 29                      | 422 (40.7)          | 10                      |
| 6 (n=423)                                    | 24                            | 240 (56.7)          | 14                      | 183 (43.3)          | 10                      |
| 7 (n=179)                                    | 16                            | 89 (49.7)           | 9                       | 90 (50.3)           | 7                       |
| 8-9 (n=51)                                   | 5                             | 12 (23.5)           | 1                       | 39 (76.5)           | 4                       |

**Table S6. Number of events and event rates within one year per 100 patient-years with exact 95% Poisson confidence intervals (CI) by CHA<sub>2</sub>DS<sub>2</sub>-VASc score at discharge among 5875 patients with new-onset post-operative atrial fibrillation after isolated first-time coronary bypass surgery with at least one year follow-up and without oral anticoagulation**

| CHA <sub>2</sub> DS <sub>2</sub> -VASc | n (%)       | Ischemic stroke          |                                          |
|----------------------------------------|-------------|--------------------------|------------------------------------------|
|                                        |             | No. of Events<br>(n=124) | Event rate/100 patient-years<br>(95% CI) |
| 1                                      | 314 (5.3)   | 1                        | 0.3 (0.0-2.3)                            |
| 2                                      | 1007 (17.1) | 7                        | 0.7 (0.3-1.5)                            |
| 3                                      | 1531 (26.1) | 18                       | 1.2 (0.7-1.9)                            |
| 4                                      | 1492 (25.4) | 30                       | 2.0 (1.4-2.9)                            |
| 5                                      | 953 (16.2)  | 33                       | 3.5 (2.5-4.9)                            |
| 6                                      | 380 (6.5)   | 20                       | 5.3 (3.4-8.2)                            |
| 7                                      | 152 (2.6)   | 12                       | 7.9 (4.5-13.9)                           |
| 8-9                                    | 46 (0.8)    | 3                        | 6.5 (2.1-20.2)                           |

**Table S7. Logistic regression sensitivity and specificity for the prediction of the one-year risk for ischemic stroke and any thromboembolism by CHA<sub>2</sub>DS<sub>2</sub>-VASc score.**

| <b>CHA<sub>2</sub>DS<sub>2</sub>-VASc</b> | <b>Ischemic stroke</b> |                    | <b>Any thromboembolism</b> |                    |
|-------------------------------------------|------------------------|--------------------|----------------------------|--------------------|
|                                           | <b>Sensitivity</b>     | <b>Specificity</b> | <b>Sensitivity</b>         | <b>Specificity</b> |
| <b>1</b>                                  | 0                      | 1                  | 0                          | 1                  |
| <b>2</b>                                  | 0.07                   | 0.98               | 0.06                       | 0.98               |
| <b>3</b>                                  | 0.09                   | 0.97               | 0.09                       | 0.97               |
| <b>4</b>                                  | 0.24                   | 0.91               | 0.22                       | 0.92               |
| <b>5</b>                                  | 0.48                   | 0.76               | 0.44                       | 0.76               |
| <b>6</b>                                  | 0.73                   | 0.50               | 0.68                       | 0.51               |
| <b>7</b>                                  | 0.91                   | 0.24               | 0.88                       | 0.24               |
| <b>8-9</b>                                | 0.99                   | 0.06               | 0.98                       | 0.06               |



**Table S8. Number of events and event rates for ischemic stroke within one year per 100 patient-years with exact 95% Poisson confidence intervals (CI) by CHA<sub>2</sub>DS<sub>2</sub>-VASc score at discharge among all patients (n= 8232) with new-onset post-operative atrial fibrillation (POAF).**

| <b>CHA<sub>2</sub>DS<sub>2</sub>-VASc</b> | <b>n (%)</b> | <b>Events<br/>(n= 209)</b> | <b>Event<br/>rate/100<br/>patient-years<br/>(95% CI)</b> |
|-------------------------------------------|--------------|----------------------------|----------------------------------------------------------|
| 1                                         | 392 (4.8)    | 2                          | 0.5 (0.1-2.0)                                            |
| 2                                         | 1310 (15.9)  | 9                          | 0.7 (0.4-1.3)                                            |
| 3                                         | 2165 (26.3)  | 27                         | 1.2 (0.9-1.8)                                            |
| 4                                         | 2132 (25.9)  | 44                         | 2.1 (1.5-2.8)                                            |
| 5                                         | 1331 (16.2)  | 55                         | 4.1 (3.2-5.4)                                            |
| 6                                         | 588 (7.1)    | 43                         | 7.3 (5.4-9.9)                                            |
| 7                                         | 244 (3.0)    | 22                         | 9.0 (5.9-13.7)                                           |
| 8-9                                       | 70 (0.9)     | 7                          | 10.0 (4.8-21.0)                                          |

**Table S9. Number of events and event rates for ischemic stroke within one year per 100 patient-years with exact 95% Poisson confidence intervals (CI) by CHA<sub>2</sub>DS<sub>2</sub>-VASc score at discharge among 1864 patients with new-onset post-operative atrial fibrillation (POAF) discharged on oral anticoagulants (OAC).**

| <b>CHA<sub>2</sub>DS<sub>2</sub>-VASc</b> | <b>n (%)</b> | <b>Events<br/>(n= 51)</b> | <b>Event<br/>rate/100<br/>patient-years<br/>(95% CI)</b> |
|-------------------------------------------|--------------|---------------------------|----------------------------------------------------------|
| 1                                         | 64 (3.4)     | 0                         | 0 (0.0-5.6)                                              |
| 2                                         | 244 (13.1)   | 1                         | 0.4 (0.1-2.9)                                            |
| 3                                         | 503 (27.0)   | 3                         | 0.6 (0.2-1.8)                                            |
| 4                                         | 511 (27.4)   | 10                        | 2.0 (1.1-3.6)                                            |
| 5                                         | 293 (15.7)   | 13                        | 4.4 (2.6-7.6)                                            |
| 6                                         | 165 (8.9)    | 17                        | 10.3 (6.4-16.6)                                          |
| 7                                         | 65 (3.5)     | 5                         | 7.7 (3.2-18.5)                                           |
| 8-9                                       | 19 (1.0)     | 2                         | 10.5 (2.6-42.1)                                          |

**Figure S1. ROC for CHA<sub>2</sub>DS<sub>2</sub>-VASc score as a predictor of ischemic stroke and any thromboembolism.**

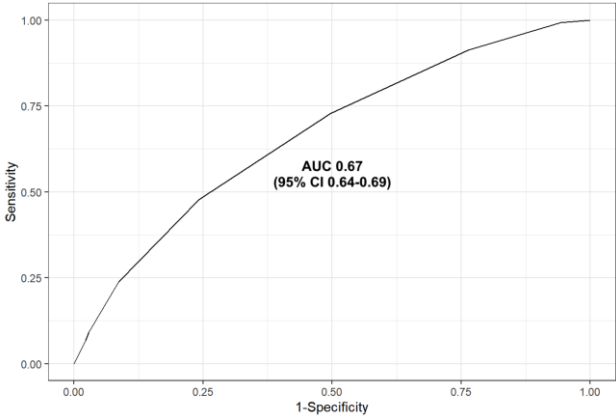

**Ischemic stroke**

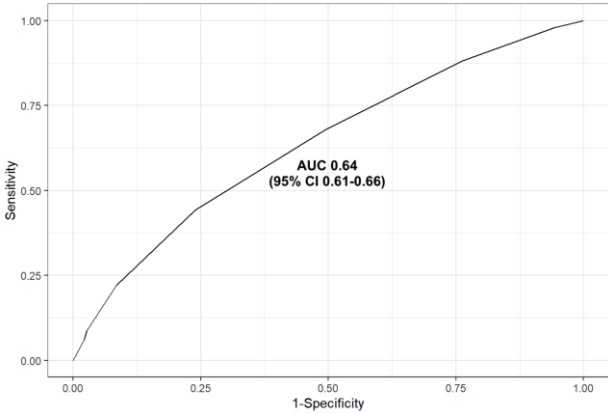

**Any thromboembolism**

Figure S2. Oral anticoagulants at discharge.

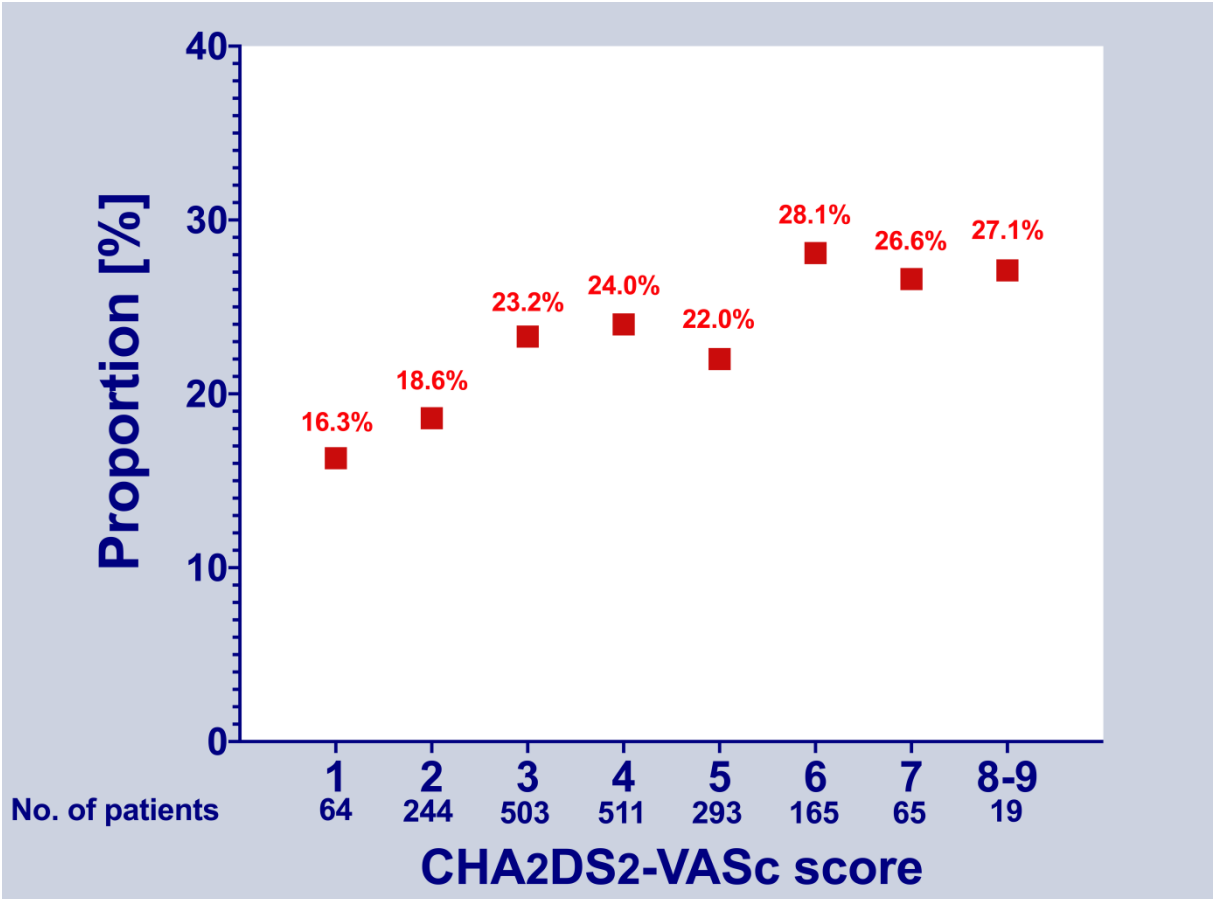

]Proportions of patients with oral anticoagulant prescription at discharge among 8348 patients with new-onset post-operative atrial fibrillation divided by CHA2DS2-VASc score.
